# Supplementary material for: Noble Gas in a Ring
Source: MDPI journal article supplement (doi:10.3390/molecules26154677), 2021-08-02
Supplement: s1 [file s1]

## Supporting Information for:

### Noble Gas in a Ring

**Wei-Te Lin<sup>a</sup>, Ya-Jyun Shih<sup>a</sup>, Tzu-Jeng Hsu<sup>b</sup>, and Wei-Ping Hu<sup>a,\*</sup>**

<sup>a</sup>Department of Chemistry and Biochemistry, National Chung Cheng University,  
Chia-Yi, Taiwan, R.O.C.

<sup>b</sup>Department of Mechanical Engineering, Chung Yuan Christian University,  
Chung-Li, Taiwan, R.O.C.

Correspondence: W.-P. Hu\* ([chewph@ccu.edu.tw](mailto:chewph@ccu.edu.tw))

26 Pages, 7 Figures, and 12 Tables

Submitted to *Molecules*, July 2021

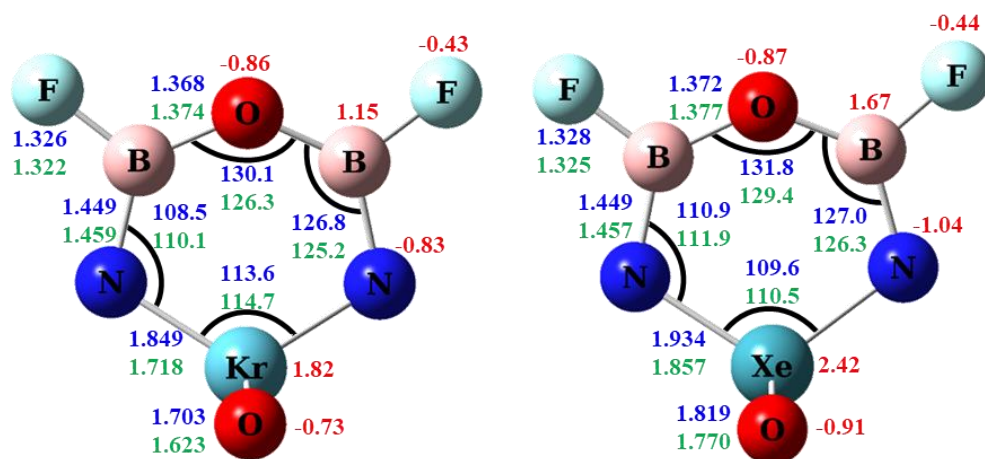

**Figure S1.** Calculated structure of **C1**,  $\text{NgO}_2\text{N}_2\text{B}_2\text{F}_2$  ( $\text{Ng} = \text{Kr}, \text{Xe}$ ) at B3LYP/aptz and MP2/aptz levels. The numbers in blue and green are values calculated by the B3LYP/aptz and MP2/aptz methods, respectively. The bond distances are in angstroms and the bond angles in degrees. The values in red are NBO atomic charges calculated at B3LYP/aptz level.

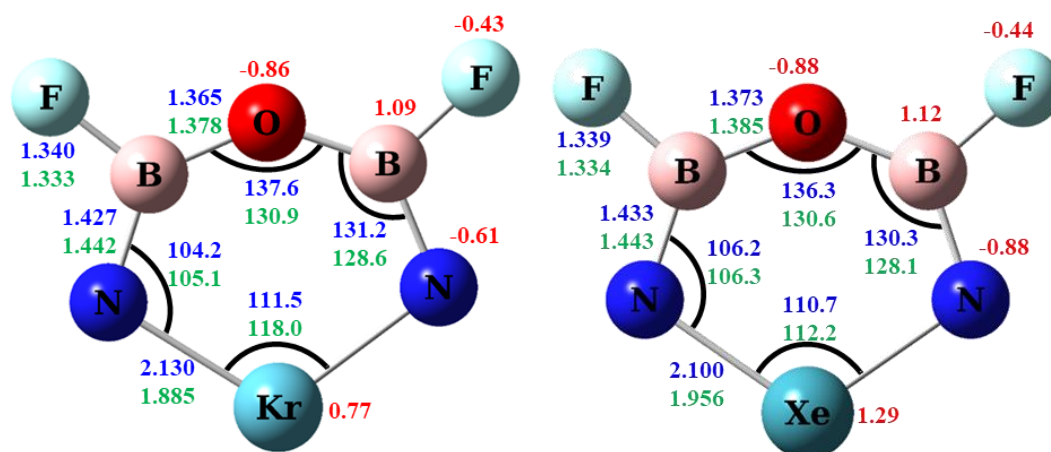

**Figure S2.** Calculated structure of **P1**,  $\text{NgON}_2\text{B}_2\text{F}_2$  ( $\text{Ng} = \text{Kr}, \text{Xe}$ ) at B3LYP/aptz and MP2/aptz levels. The bond distances are in angstroms and the bond angles in degrees. The numbers in blue and green are values calculated by the B3LYP/aptz and MP2/aptz methods, respectively. The values in red are NBO atomic charges calculated at B3LYP/aptz level.

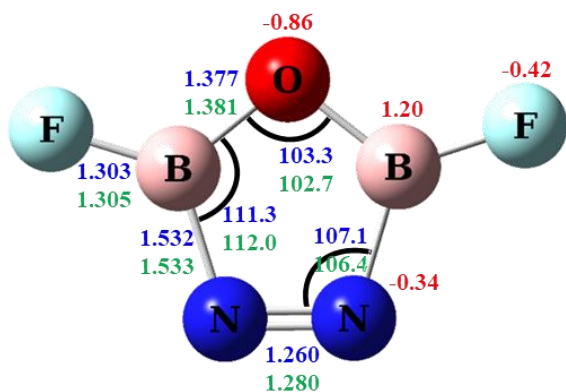

**Figure S3.** Calculated structure of **P2**,  $\text{ON}_2\text{B}_2\text{F}_2$  at B3LYP/aptz and MP2/aptz levels. The numbers in blue and green are values calculated by the B3LYP/aptz and MP2/aptz methods, respectively. The bond distances are in angstroms and the bond angles in degrees. The values in red are NBO atomic charges calculated at B3LYP/aptz level.

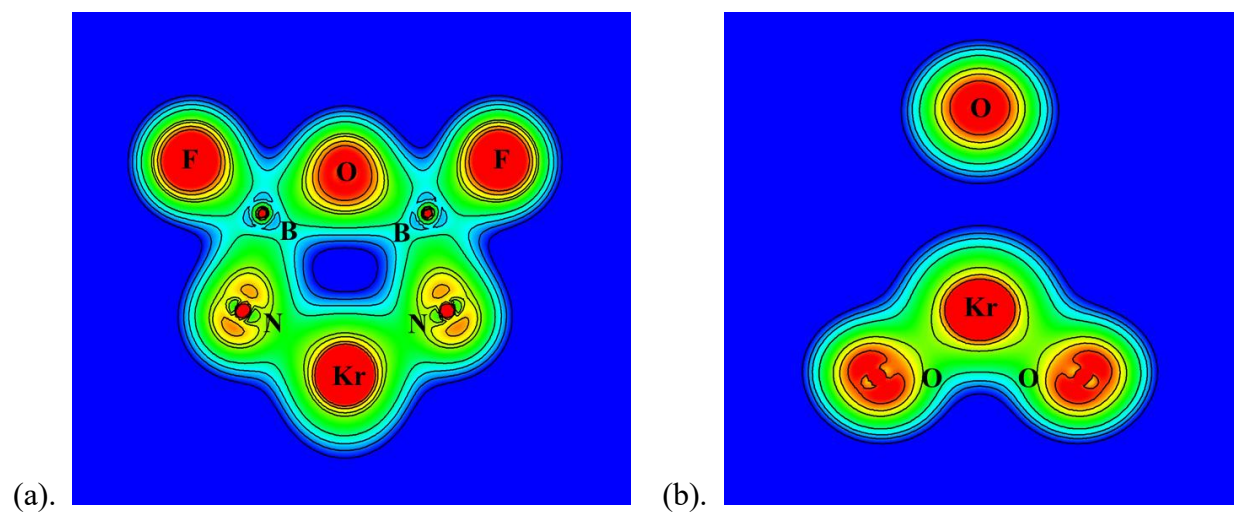

**Figure S4.** Contour plots of the calculated electron density of  $\text{KrO}_3\text{N}_2\text{B}_2\text{F}_2$  on (a) the ring plane (b) the  $\text{KrO}_3$  plane.

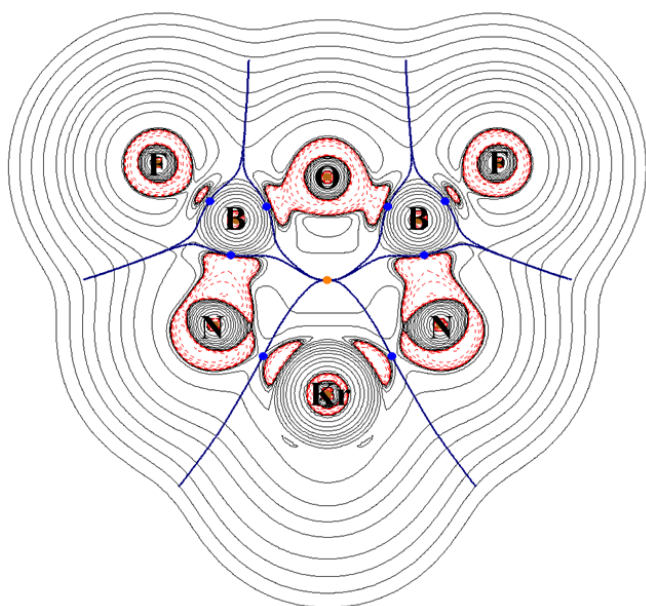

(a).

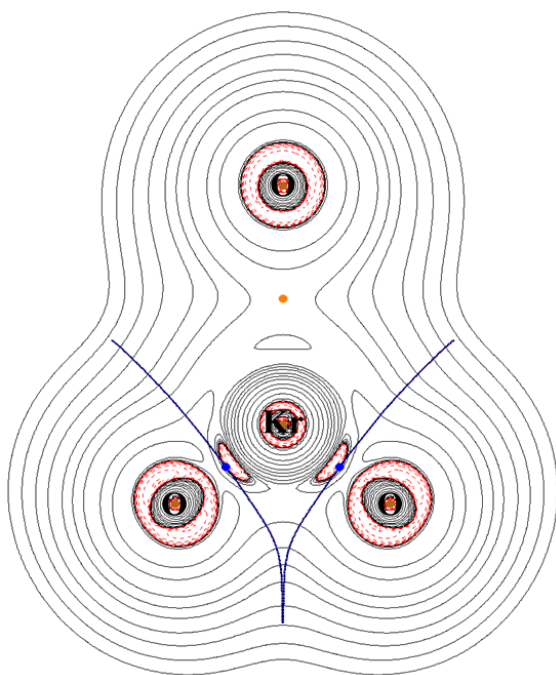

(b).

**Figure S5.** Contour plots of the calculated Laplace concentration of  $\text{KrO}_3\text{N}_2\text{B}_2\text{F}_2$  on (a) the ring plane (b) the  $\text{KrO}_3$  plane. The red contour lines are in regions of charge concentration and the black contour lines are in regions of charge depletion. The blue lines pass points of zero gradients, and the dots are bond critical points.

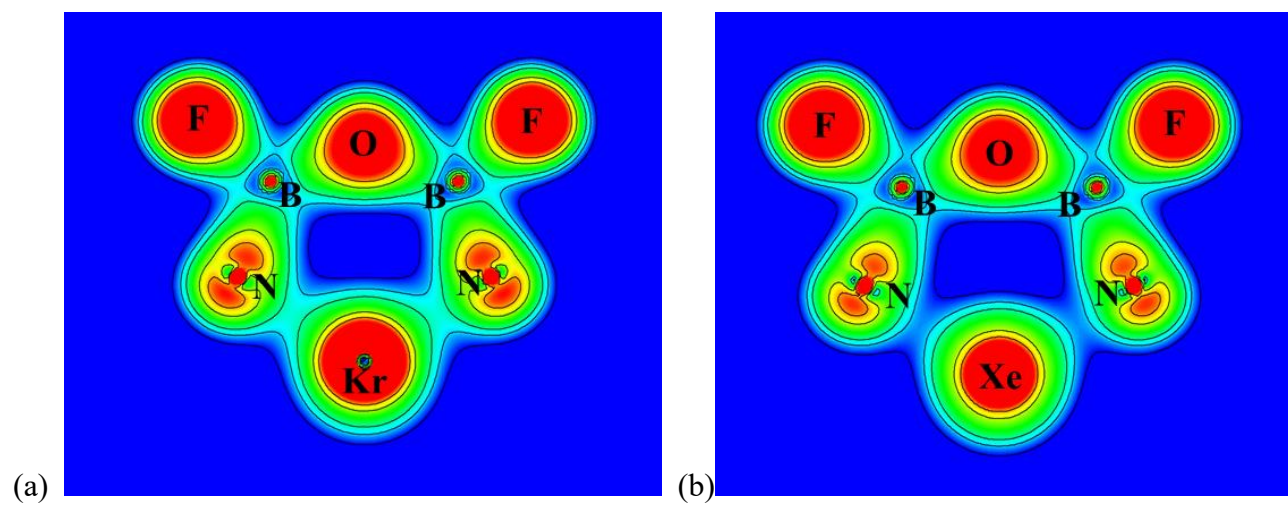

**Figure S6.** Contour plots of the calculated electron density of **P1**.

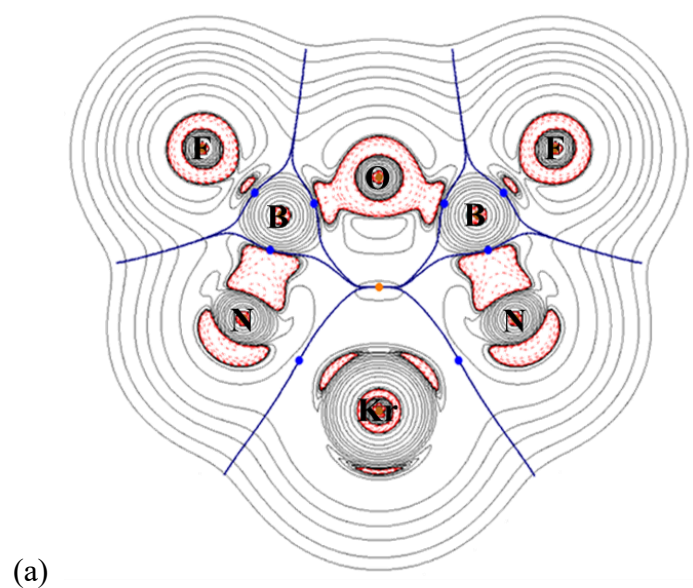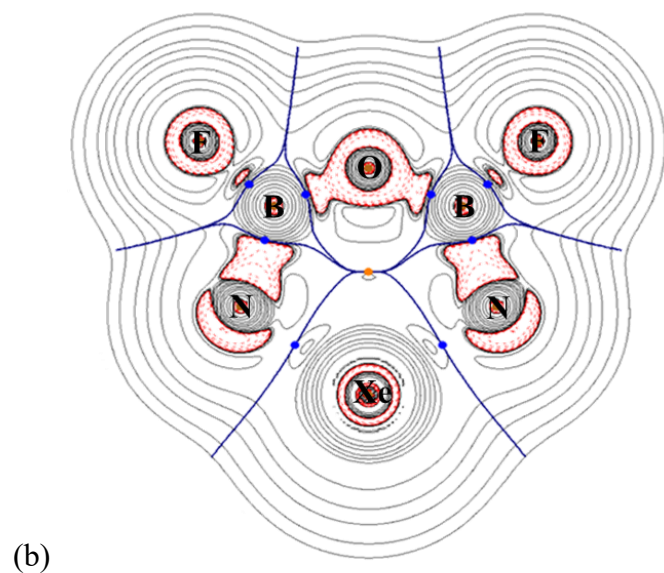

**Figure S7.** Contour plots of the calculated Laplace concentration of **P1**. The red contour lines are in regions of charge concentration and the black contour lines are in regions of charge depletion. The blue lines pass points of zero gradients, and the dots are bond critical points.



**Table S1.** Calculated structural parameters of **R**, NgO<sub>3</sub>N<sub>2</sub>B<sub>2</sub>F<sub>2</sub> (Ng = Kr and Xe).  
The bond distances are in angstroms and bond angles in degrees.

|                | <b>MP2/aptz</b> | <b>B3LYP/aptz</b> | <b>M06-2X/aptz</b> |
|----------------|-----------------|-------------------|--------------------|
| <i>Ng = Kr</i> |                 |                   |                    |
| R(Ng-N)        | 1.693           | 1.797             | 1.738              |
| R(Ng-O)        | 1.588           | 1.645             | 1.616              |
| R(O-B)         | 1.370           | 1.366             | 1.361              |
| R(B-N)         | 1.461           | 1.454             | 1.454              |
| R(B-F)         | 1.319           | 1.322             | 1.314              |
| A(B-O-B)       | 126.1           | 129.9             | 128.6              |
| A(O-B-N)       | 125.9           | 126.8             | 125.9              |
| A(Ng-N-B)      | 112.2           | 109.8             | 111.2              |
| A(N-Ng-N)      | 117.7           | 117.0             | 117.3              |
| A(O-Ng-O)      | 106.9           | 106.8             | 107.1              |
| <i>Ng = Xe</i> |                 |                   |                    |
| R(Ng-N)        | 1.847           | 1.912             | 1.869              |
| R(Ng-O)        | 1.746           | 1.785             | 1.759              |
| R(O-B)         | 1.375           | 1.370             | 1.366              |
| R(B-N)         | 1.466           | 1.457             | 1.457              |
| R(B-F)         | 1.320           | 1.323             | 1.315              |
| A(B-O-B)       | 130.2           | 132.6             | 132.1              |
| A(O-B-N)       | 126.9           | 127.2             | 126.4              |
| A(Ng-N-B)      | 110.7           | 109.9             | 110.7              |
| A(N-Ng-N)      | 114.5           | 113.1             | 113.6              |
| A(O-Ng-O)      | 105.9           | 105.6             | 106.2              |

**Table S2.** The calculated structural parameters of **C1**, NgO<sub>2</sub>N<sub>2</sub>B<sub>2</sub>F<sub>2</sub> (Ng = Kr and Xe). The bond distances are in angstroms and bond angles in degrees.

|                | <b>MP2/aptz</b> | <b>B3LYP/aptz</b> | <b>M06-2X/aptz</b> |
|----------------|-----------------|-------------------|--------------------|
| <i>Ng = Kr</i> |                 |                   |                    |
| R(Ng-O)        | 1.623           | 1.703             | 1.672              |
| R(Ng-N)        | 1.718           | 1.849             | 1.799              |
| R(O-B)         | 1.374           | 1.368             | 1.365              |
| R(B-N)         | 1.459           | 1.449             | 1.451              |
| R(B-F)         | 1.322           | 1.326             | 1.318              |
| A(B-O-B)       | 126.3           | 130.1             | 129.2              |
| A(O-B-N)       | 125.2           | 126.8             | 126.0              |
| A(Ng-N-B)      | 110.1           | 108.5             | 108.1              |
| A(N-Ng-N)      | 114.7           | 113.6             | 114.4              |
| <i>Ng = Xe</i> |                 |                   |                    |
| R(Ng-O)        | 1.770           | 1.819             | 1.794              |
| R(Ng-N)        | 1.857           | 1.934             | 1.902              |
| R(O-B)         | 1.377           | 1.372             | 1.368              |
| R(B-N)         | 1.457           | 1.449             | 1.448              |
| R(B-F)         | 1.325           | 1.328             | 1.332              |
| A(B-O-B)       | 129.4           | 131.8             | 131.5              |
| A(O-B-N)       | 126.3           | 127.0             | 126.6              |
| A(Ng-N-B)      | 111.9           | 110.9             | 110.7              |
| A(N-Ng-N)      | 110.5           | 109.6             | 110.3              |

**Table S3.** The calculated structure parameters of **P1**, NgON<sub>2</sub>B<sub>2</sub>F<sub>2</sub> (Ng = Kr and Xe). The bond distances are in angstroms and bond angles in degrees.

|                | <b>MP2/aptz</b> | <b>B3LYP/aptz</b> | <b>M06-2X/aptz</b> |
|----------------|-----------------|-------------------|--------------------|
| <i>Ng = Kr</i> |                 |                   |                    |
| R(Ng-N)        | 1.885           | 2.130             | 2.013              |
| R(O-B)         | 1.378           | 1.365             | 1.363              |
| R(B-N)         | 1.442           | 1.427             | 1.435              |
| R(B-F)         | 1.333           | 1.340             | 1.329              |
| A(B-O-B)       | 130.9           | 137.6             | 135.9              |
| A(O-B-N)       | 128.6           | 131.2             | 129.9              |
| A(Ng-N-B)      | 105.1           | 104.2             | 104.4              |
| A(N-Ng-N)      | 118.0           | 111.5             | 115.6              |
| <i>Ng = Xe</i> |                 |                   |                    |
| R(Ng-N)        | 1.956           | 2.100             | 2.053              |
| R(O-B)         | 1.385           | 1.373             | 1.369              |
| R(B-N)         | 1.443           | 1.433             | 1.435              |
| R(B-F)         | 1.334           | 1.339             | 1.330              |
| A(B-O-B)       | 130.6           | 136.3             | 135.7              |
| A(O-B-N)       | 128.1           | 130.3             | 129.7              |
| A(Ng-N-B)      | 106.3           | 106.2             | 106.5              |
| A(N-Ng-N)      | 112.2           | 110.7             | 111.9              |

**Table S4.** The calculated dissociation energies of R1 and the vertical singlet-triplet energy gaps (kcal/mol) of **R** at various theoretical levels.

|                           | C1 + O(S) | C1 + O(T) | P1+ O(S) +<br>O(S) | P1+ O(T) +<br>O(T) | S-T gap |
|---------------------------|-----------|-----------|--------------------|--------------------|---------|
| <i>Ng = Kr</i>            |           |           |                    |                    |         |
| MP2/aptz                  | 77.5      | 11.4      | 148.9              | 16.7               | 95.9    |
| B3LYP/aptz                | 59.5      | -3.9      | 114.0              | -12.8              | 65.1    |
| M06-2X/aptz               | 57.7      | -2.1      | 106.7              | -12.6              | 82.2    |
| CCSD(T)/aptz <sup>a</sup> | 49.5      | -1.3      | 93.9               | -7.8               | 71.8    |
| <i>Ng = Xe</i>            |           |           |                    |                    |         |
| MP2/aptz                  | 98.4      | 32.3      | 206.1              | 73.9               | 103.6   |
| B3LYP/aptz                | 81.0      | 17.6      | 169.0              | 42.1               | 63.7    |
| M06-2X/aptz               | 77.5      | 17.9      | 155.4              | 36.1               | 91.2    |
| CCSD(T)/aptz <sup>a</sup> | 72.6      | 21.7      | 153.3              | 51.6               | 73.7    |

<sup>a</sup>Single-point calculation using B3LYP/aptz structures.

**Table S5.** Calculated dissociation barriers and reaction energies (kcal/mol) of R2 relative to **R**.

|                           | Barrier (TS1) | Complex (C2) | Barrier (TS2) | NgO <sub>2</sub> + ON <sub>2</sub> B <sub>2</sub> F <sub>2</sub> (P2) |
|---------------------------|---------------|--------------|---------------|-----------------------------------------------------------------------|
| <i>Ng = Kr</i>            |               |              |               |                                                                       |
| MP2/aptz                  | 37.7          | 23.5         | 34.9          | -106.0                                                                |
| B3LYP/aptz                | 15.5          | 10.1         | 15.4          | -122.7                                                                |
| M06-2X/aptz               | 22.0          | 13.7         | 19.3          | -121.1                                                                |
| CCSD(T)/aptz <sup>a</sup> | 21.9          | 14.5         | 19.6          | -116.5                                                                |
| <i>Ng = Xe</i>            |               |              |               |                                                                       |
| MP2/aptz                  | 45.7          | 31.2         | 45.7          | -63.9                                                                 |
| B3LYP/aptz                | 26.3          | 18.5         | 24.7          | -85.9                                                                 |
| M06-2X/aptz               | 33.8          | 21.7         | 29.1          | -86.0                                                                 |
| CCSD(T)/aptz <sup>a</sup> | 35.7          | 25.1         | 32.0          | -74.1                                                                 |

<sup>a</sup>Single-point calculation using B3LYP/aptz structures.

**Table S6.** Calculated dissociation barriers and reaction energies (kcal/mol) of R3 relative to **R**.

|                           | Barrier (TS3) | NgON <sub>2</sub> B <sub>2</sub> F <sub>2</sub> (P1) + O <sub>2</sub> |
|---------------------------|---------------|-----------------------------------------------------------------------|
| <i>Ng = Kr</i>            |               |                                                                       |
| MP2/aptz <sup>a</sup>     | 90.5          | -84.8                                                                 |
| B3LYP/aptz                | 53.1          | -97.5                                                                 |
| M06-2X/aptz <sup>a</sup>  | 65.4          | -96.6                                                                 |
| CCSD(T)/aptz <sup>a</sup> | 61.7          | -92.6                                                                 |
| <i>Ng = Xe</i>            |               |                                                                       |
| MP2/aptz <sup>a</sup>     | 103.1         | -22.2                                                                 |
| B3LYP/aptz                | 54.7          | -42.6                                                                 |
| M06-2X/aptz               | 71.9          | -47.8                                                                 |
| CCSD(T)/aptz <sup>a</sup> | 71.4          | -33.2                                                                 |

<sup>a</sup>Single-point calculation using B3LYP/aptz structures.

**Table S7.** Calculated dissociation barriers, reaction energies, and the vertical singlet-triplet energy gaps (kcal/mol) of **P1**.

|                           | <b>Barrier<br/>(TS4)</b> | <b>Complex<br/>(C3)</b> | <b>Barrier<br/>(TS5)</b> | <b>Ng + (P2)</b> | <b>S-T gap</b> |
|---------------------------|--------------------------|-------------------------|--------------------------|------------------|----------------|
| <i>Ng = Kr</i>            |                          |                         |                          |                  |                |
| <b>MP2/aptz</b>           | <b>12.0</b>              | <b>1.4</b>              | <b>12.2</b>              | <b>-160.7</b>    | <b>42.8</b>    |
| B3LYP/aptz                | 4.9                      | 0.4                     | 4.9                      | -147.9           | 21.8           |
| M06-2X/aptz               | 5.4                      | 1.0                     | 5.4                      | -152.2           | 39.9           |
| CCSD(T)/aptz <sup>a</sup> | 5.7                      | 1.1                     | 5.7                      | -150.8           | 19.4           |
| <i>Ng = Xe</i>            |                          |                         |                          |                  |                |
| <b>MP2/aptz</b>           | <b>28.7</b>              | <b>17.5</b>             | <b>29.0</b>              | <b>-128.6</b>    | <b>55.6</b>    |
| B3LYP/aptz                | 13.7                     | 9.5                     | 16.2                     | -128.7           | 34.4           |
| M06-2X/aptz               | 15.2                     | 10.4                    | 16.1                     | -132.7           | 48.6           |
| CCSD(T)/aptz <sup>a</sup> | 17.6                     | 13.0                    | 18.3                     | -126.1           | 37.3           |

<sup>a</sup>Single-point calculation using B3LYP/aptz structures.

**Table S8.** Electron density ( $\rho$ ), the Laplacian of electron density ( $\nabla^2\rho$ ) and the local energy density  $H(r_c)$  at the bond critical points (BCPs) in  $\text{NgO}_3\text{N}_2\text{B}_2\text{F}_2$  using the electron density calculated at the B3LYP/aptz level.

| $\text{NgO}_3\text{N}_2\text{B}_2\text{F}_2$ | $\rho(r)$ | $\nabla^2\rho(r)$ | $H(r)$ |
|----------------------------------------------|-----------|-------------------|--------|
| <i>Ng = Kr</i>                               |           |                   |        |
| B–F                                          | 0.211     | 1.162             | -0.172 |
| B–N                                          | 0.196     | 0.233             | -0.201 |
| B–O                                          | 0.209     | 0.766             | -0.190 |
| Kr–N                                         | 0.195     | 0.069             | -0.118 |
| Kr–O                                         | 0.269     | -0.011            | -0.232 |
| <i>Ng = Xe</i>                               |           |                   |        |
| B–F                                          | 0.211     | 1.157             | -0.172 |
| B–N                                          | 0.194     | 0.219             | -0.199 |
| B–O                                          | 0.206     | 0.753             | -0.186 |
| Xe–N                                         | 0.178     | 0.020             | -0.117 |
| Xe–O                                         | 0.217     | 0.215             | -0.174 |



**Table S9.** Calculated cartesian coordinates (in Å) of R, NgO<sub>3</sub>N<sub>2</sub>B<sub>2</sub>F<sub>2</sub> (Ng = Kr and Xe) at B3LYP/aptz level.

**R**

*Ng = Kr*

|    |           |           |           |
|----|-----------|-----------|-----------|
| N  | 0.000000  | 1.531986  | 0.051717  |
| N  | 0.000000  | -1.531986 | 0.051717  |
| O  | -1.320903 | 0.000000  | 1.971390  |
| O  | 1.320903  | 0.000000  | 1.971390  |
| B  | 0.000000  | 1.236995  | -1.371738 |
| B  | 0.000000  | -1.236995 | -1.371738 |
| F  | 0.000000  | 2.308990  | -2.145274 |
| F  | 0.000000  | -2.308990 | -2.145274 |
| O  | 0.000000  | 0.000000  | -1.950496 |
| Kr | 0.000000  | 0.000000  | 0.990833  |

*Ng = Xe*

|    |           |           |           |
|----|-----------|-----------|-----------|
| N  | 0.000000  | 1.595740  | -0.174249 |
| N  | 0.000000  | -1.595740 | -0.174249 |
| O  | -1.421201 | 0.000000  | 1.958820  |
| O  | 1.421201  | 0.000000  | 1.958820  |
| B  | 0.000000  | 1.254979  | -1.590621 |
| B  | 0.000000  | -1.254979 | -1.590621 |
| F  | 0.000000  | 2.294357  | -2.408588 |
| F  | 0.000000  | -2.294357 | -2.408588 |
| O  | 0.000000  | 0.000000  | -2.140951 |
| Xe | 0.000000  | 0.000000  | 0.879385  |

**Table S10.** Calculated cartesian coordinates (in Å) of the transition states at B3LYP/aptz level.

**TS1**

*Ng = Kr*

|    |           |           |           |
|----|-----------|-----------|-----------|
| N  | -1.022970 | -1.751210 | -0.162290 |
| N  | 0.508832  | 1.409124  | 0.148777  |
| O  | 2.321205  | -0.136660 | -1.247340 |
| O  | 1.982038  | -0.593700 | 1.401151  |
| B  | -2.162350 | -0.951220 | -0.077280 |
| B  | -0.927940 | 1.413661  | 0.024147  |
| F  | -3.419550 | -1.332170 | 0.054088  |
| F  | -1.467110 | 2.623203  | 0.095328  |
| O  | -1.796790 | 0.371859  | -0.171270 |
| Kr | 1.193852  | -0.240800 | -0.023470 |

*Ng = Xe*

|    |           |           |           |
|----|-----------|-----------|-----------|
| N  | -1.127490 | -1.674970 | -0.478640 |
| N  | 0.122229  | 1.425151  | 0.355842  |
| O  | 2.557750  | 0.470607  | -0.828920 |
| O  | -2.077470 | 0.370517  | -0.339090 |
| B  | -2.304370 | -0.977570 | -0.192580 |
| B  | -1.281360 | 1.424288  | 0.085474  |
| F  | -3.479000 | -1.479670 | 0.139648  |
| F  | -1.915160 | 2.580233  | 0.230389  |
| O  | 1.573383  | -0.922040 | 1.473057  |
| Xe | 1.057105  | -0.180420 | -0.081030 |

---

## TS2

$Ng = Kr$

|    |           |           |           |
|----|-----------|-----------|-----------|
| N  | -0.412780 | 1.337634  | 0.243292  |
| N  | 1.162706  | -0.762850 | 1.338630  |
| O  | 1.911625  | 0.422276  | -0.375010 |
| O  | -0.750960 | -1.199990 | -1.174200 |
| B  | 0.984253  | 1.420206  | -0.121470 |
| B  | 2.011169  | -0.816890 | 0.218878  |
| F  | 1.420396  | 2.667037  | -0.216580 |
| F  | 2.783730  | -1.786990 | -0.218180 |
| O  | -2.817750 | 0.204089  | -0.081650 |
| Kr | -1.244640 | -0.288100 | 0.149979  |

$Ng = Xe$

|    |           |           |           |
|----|-----------|-----------|-----------|
| N  | -0.074050 | 1.408114  | 0.172101  |
| N  | 1.264133  | -0.842750 | 1.235931  |
| O  | -0.661300 | -1.232660 | -1.259540 |
| O  | 2.245143  | 0.391943  | -0.233310 |
| B  | 1.330121  | 1.443202  | -0.101080 |
| B  | 2.212995  | -0.912640 | 0.206344  |
| F  | 1.860951  | 2.646562  | -0.257470 |
| F  | 2.958375  | -1.885490 | -0.260040 |
| O  | -2.712420 | 0.511977  | -0.255520 |
| Xe | -1.118360 | -0.200560 | 0.152999  |

---

### TS3

$Ng = Kr$

|    |           |           |           |
|----|-----------|-----------|-----------|
| N  | -0.211060 | 1.472209  | -0.184650 |
| N  | 0.337625  | -1.587170 | -0.283710 |
| O  | -2.864260 | 0.366796  | -0.430700 |
| O  | -1.743380 | -0.525400 | 1.342569  |
| B  | 1.223718  | 1.390239  | 0.050957  |
| B  | 1.652508  | -1.046820 | -0.039140 |
| F  | 1.810051  | 2.575661  | 0.117034  |
| F  | 2.624249  | -1.950270 | -0.044550 |
| O  | 1.982100  | 0.266314  | 0.167285  |
| Kr | -0.949210 | -0.205630 | -0.168500 |

Note: TS3 for  $Ng = Kr$  needs a previously saved checkpoint file to converge to the correct state. At this geometry, there seem to be several low-lying singlet states that may cross each other. The authors can provide the checkpoint file upon request.

$Ng = Xe$

|    |           |           |           |
|----|-----------|-----------|-----------|
| N  | 0.036610  | 1.537887  | -0.105480 |
| N  | 0.501241  | -1.611690 | -0.214370 |
| O  | 2.190836  | 0.232223  | 0.130398  |
| O  | -2.689280 | 0.535000  | -0.175990 |
| B  | 1.474474  | 1.391724  | 0.067638  |
| B  | 1.823923  | -1.085470 | -0.004200 |
| F  | 2.134385  | 2.537571  | 0.159698  |
| F  | 2.793092  | -1.995280 | 0.038256  |
| O  | -1.675340 | -0.504100 | 1.457665  |
| Xe | -0.874330 | -0.148150 | -0.206600 |

---

## TS4

$Ng = Kr$

|    |           |           |           |
|----|-----------|-----------|-----------|
| N  | 0.880398  | 1.488710  | -0.164510 |
| N  | -0.862700 | -1.798460 | -0.311860 |
| B  | -0.523900 | 1.407796  | 0.010911  |
| B  | -1.866600 | -0.873570 | -0.006030 |
| F  | -1.060740 | 2.636149  | -0.084590 |
| F  | -3.162390 | -1.161390 | 0.041389  |
| O  | -1.379890 | 0.370184  | 0.276044  |
| Kr | 1.690999  | -0.464920 | 0.041405  |

$Ng = Xe$

|    |           |           |           |
|----|-----------|-----------|-----------|
| N  | 0.404977  | 1.580454  | -0.224950 |
| N  | -1.094290 | -1.790910 | -0.356870 |
| B  | -0.974010 | 1.381963  | 0.021916  |
| B  | -2.161430 | -0.967820 | 0.002150  |
| F  | -1.687260 | 2.513082  | -0.103640 |
| F  | -3.449760 | -1.285960 | 0.016570  |
| O  | -1.680290 | 0.253036  | 0.397205  |
| Xe | 1.484775  | -0.253070 | 0.028860  |

---

## TS5

$Ng = Kr$

|    |           |           |           |
|----|-----------|-----------|-----------|
| N  | 1.170966  | -0.875640 | 1.359628  |
| N  | -0.685820 | 1.407568  | 0.345618  |
| B  | 1.789980  | -0.826220 | 0.096170  |
| B  | 0.658737  | 1.326740  | -0.110520 |
| F  | 2.636961  | -1.731020 | -0.376930 |
| F  | 1.247066  | 2.524521  | 0.002379  |
| O  | 1.396955  | 0.271861  | -0.627960 |
| Kr | -1.715880 | -0.431730 | -0.096400 |

$Ng = Xe$

|    |           |           |           |
|----|-----------|-----------|-----------|
| N  | 1.515627  | -0.847640 | 1.359227  |
| N  | -0.277200 | 1.495686  | 0.312977  |
| B  | 2.130665  | -0.894720 | 0.098480  |
| B  | 1.066196  | 1.320684  | -0.107110 |
| F  | 2.930881  | -1.834570 | -0.384820 |
| F  | 1.774994  | 2.452734  | -0.009170 |
| O  | 1.737359  | 0.203721  | -0.624100 |
| Xe | -1.498240 | -0.256660 | -0.057850 |

---

**Table S11.** Calculated cartesian coordinates (in Å) of the complexes at B3LYP/aptz level.

**C1**

Ng = Kr

|    |           |           |           |
|----|-----------|-----------|-----------|
| N  | -0.348076 | -0.202874 | 1.546728  |
| N  | -0.348076 | -0.202874 | -1.546728 |
| O  | 1.378100  | -1.954463 | 0.000000  |
| B  | -0.069787 | 1.185556  | 1.240385  |
| B  | -0.069787 | 1.185556  | -1.240385 |
| F  | -0.069787 | 1.991712  | 2.293632  |
| F  | -0.069787 | 1.991712  | -2.293632 |
| O  | 0.134936  | 1.724942  | 0.000000  |
| Kr | -0.146589 | -1.195277 | 0.000000  |

Ng = Xe

|    |           |           |           |
|----|-----------|-----------|-----------|
| N  | 0.274497  | 0.041077  | 1.579808  |
| N  | 0.274497  | 0.041077  | -1.579808 |
| O  | -1.547760 | -1.804483 | 0.000000  |
| B  | 0.095474  | 1.441237  | 1.252448  |
| B  | 0.095474  | 1.441237  | -1.252448 |
| F  | 0.095474  | 2.273110  | 2.287097  |
| F  | 0.095474  | 2.273110  | -2.287097 |
| O  | -0.031997 | 1.986186  | 0.000000  |
| Xe | 0.113367  | -1.062167 | 0.000000  |

**C2** $Ng = Kr$ 

|    |           |           |           |
|----|-----------|-----------|-----------|
| N  | -0.432630 | 1.356200  | -0.203110 |
| N  | 1.180112  | -0.921390 | 1.271651  |
| O  | 1.920378  | 0.445459  | 0.342989  |
| O  | -0.924140 | -1.328590 | -1.079390 |
| B  | 0.982237  | 1.414071  | -0.065920 |
| B  | 2.063646  | -0.978130 | 0.241482  |
| F  | 1.533745  | 2.585040  | -0.348750 |
| F  | 2.820003  | -1.668560 | -0.559900 |
| O  | -2.837480 | 0.245940  | 0.030448  |
| Kr | -1.247660 | -0.232620 | 0.151883  |

 $Ng = Xe$ 

|    |           |           |           |
|----|-----------|-----------|-----------|
| N  | -1.290330 | -0.979280 | -1.147530 |
| N  | 0.075233  | 1.394584  | 0.253839  |
| O  | 2.740125  | 0.555791  | 0.148138  |
| O  | -2.166810 | 0.383567  | -0.452510 |
| B  | -2.280820 | -1.027830 | -0.218380 |
| B  | -1.316960 | 1.410913  | 0.073599  |
| F  | -3.085180 | -1.689790 | 0.555721  |
| F  | -2.006840 | 2.498799  | 0.381490  |
| O  | 0.872422  | -1.355710 | 1.175842  |
| Xe | 1.125126  | -0.162460 | -0.156060 |

---



**C3** $Ng = Kr$ 

|    |           |           |           |
|----|-----------|-----------|-----------|
| N  | 2.102924  | -0.688208 | 1.423472  |
| N  | -0.862234 | 1.388065  | -0.054995 |
| B  | 2.368585  | -0.682149 | 0.089627  |
| B  | 0.496430  | 1.002708  | -0.029900 |
| F  | 3.267309  | -0.914263 | -0.837963 |
| F  | 1.333711  | 2.046883  | 0.004796  |
| O  | 1.004304  | -0.297807 | -0.102708 |
| Kr | -2.012597 | -0.397581 | -0.043273 |

 $Ng = Xe$ 

|    |           |           |          |
|----|-----------|-----------|----------|
| N  | -0.409084 | 1.460732  | -0.00685 |
| N  | 2.393419  | -0.842436 | 1.386994 |
| B  | 0.9321    | 1.032833  | -0.00978 |
| B  | 2.737291  | -0.728168 | 0.076791 |
| F  | 1.841153  | 2.014993  | 0.05914  |
| F  | 3.680818  | -0.904889 | -0.81896 |
| O  | 1.393455  | -0.291581 | -0.14258 |
| Xe | -1.723753 | -0.250179 | -0.03735 |

---

**Table S12.** Calculated cartesian coordinates (in Å) of P1 and P2 at B3LYP/aptz level.**P1***Ng = Kr*

|    |           |           |           |
|----|-----------|-----------|-----------|
| N  | -0.000082 | 0.287073  | 1.760617  |
| N  | -0.000082 | 0.287073  | -1.760617 |
| B  | -0.000634 | -1.053818 | 1.272737  |
| B  | -0.000634 | -1.053818 | -1.272737 |
| F  | -0.000082 | -1.921259 | 2.294208  |
| F  | -0.000082 | -1.921259 | -2.294208 |
| O  | -0.000631 | -1.547220 | 0.000000  |
| Kr | 0.000389  | 1.485544  | 0.000000  |

*Ng = Xe*

|    |           |           |          |
|----|-----------|-----------|----------|
| N  | 1.726866  | 0.041252  | 0.000000 |
| N  | -1.726865 | 0.041252  | 0.000000 |
| B  | 1.273728  | -1.317922 | 0.000000 |
| B  | -1.273727 | -1.317922 | 0.000000 |
| F  | 2.284665  | -2.195755 | 0.000000 |
| F  | -2.284666 | -2.195753 | 0.000000 |
| O  | 0.000000  | -1.830109 | 0.000000 |
| Xe | 0.000000  | 1.236410  | 0.000000 |

**P2**

|   |           |           |           |
|---|-----------|-----------|-----------|
| N | -0.000651 | 1.331800  | 0.629979  |
| N | -0.000651 | 1.331800  | -0.629979 |
| B | 0.000045  | -0.132861 | 1.079178  |
| B | 0.000045  | -0.132861 | -1.079178 |
| F | 0.000045  | -0.523205 | 2.322259  |
| F | 0.000045  | -0.523205 | -2.322259 |
| O | 0.000980  | -0.987363 | 0.000000  |

---
